# Supplementary material
Source: PubMed Central journal article supplement (PMC3083170)

## Supplemental Material

### Figure S1. Trypsin protection assay of transducin preparations

The sensitivity of  $\alpha$ t-GTP $\gamma$ S (lane 2),  $\alpha$ t-GDP, (lane 4) and  $\alpha$ t-GDP-AlF $_4^-$  (lane 5) to trypsin was examined. In each trypsin digestion reaction, 2  $\mu$ g of  $\alpha$ t was incubated with 0.01  $\mu$ g of trypsin (Promega) in the buffer containing 20 mM HEPES, pH 7.5, 120 mM NaCl, and 2 mM MgCl $_2$  for 30 min at room temperature. The digestion was terminated by addition of the SDS/DTT containing sample buffer followed by immediate boiling for 5 min. The proteins were resolved on a 15% SDS gel. As shown in the figure, relative to  $\alpha$ t-GDP, both  $\alpha$ t-GTP $\gamma$ S and  $\alpha$ t-GDP-AlF $_4^-$  were resistant to trypsin digestion, indicating conformations of activated  $\alpha$ t.

### Figure S2. Characterization of the BBM-PDE $\gamma$ photoprobes

**A.** Schematic of preparation of the BBM-PDE $\gamma$  derivatives. BBM is linked to PDE $\gamma$  at a given position by an S-S bond that is formed through a reaction between the methanethiosulfonate (MTS) group of BBM and the single cysteine on PDE $\gamma$ . Upon exposure of the mix of BBM-PDE $\gamma$  and its target(s) to UV light, the ketone in benzophenone is activated into a diradical and reacts with neighboring C-H bonds to form a C-C link with the PDE $\gamma$ -interacting target protein(s). Following DTT reversal of the S-S bond, PDE $\gamma$  is released and the biotin label is transferred to the target(s). For more detailed description of the label transfer strategy, please refer to Figure S1 in our previous report (13).

**B.** Functional activities of BBM-PDE $\gamma$  derivatives were determined by analyzing their ability to stimulate  $\alpha$ t GTPase, as described under Experimental Procedures. The assay was kindly conducted by Dr. Kirill Martemyanov. Data are presented as average  $\pm$ S.D. (error bar is not seen when it is too small). The dotted line indicates the  $\alpha$ t GTP hydrolysis rate with the unmodified wild type PDE $\gamma$ , which is  $0.07632 \pm 0.0027 \text{ S}^{-1}$ .

**C.** The BBM-PDE $\gamma$  photoprobes that were not used for GTPase stimulation assays (see Figure S1B) were determined for their ability to form a complex with  $\alpha$ t-GDP-AlF $_4^-$  using the native gel assay.  $\alpha$ t-GDP-AlF $_4^-$  (10  $\mu$ M) was incubated with various BBM-PDE $\gamma$  derivatives at the indicated molar ratios on ice for 30 min, and then loaded to an 8% native gel. Up-shifted Coomassie-stained bands indicate the complexes formed by GDP-AlF $_4^-$  and BBM-PDE $\gamma$  derivatives.

Figure S1

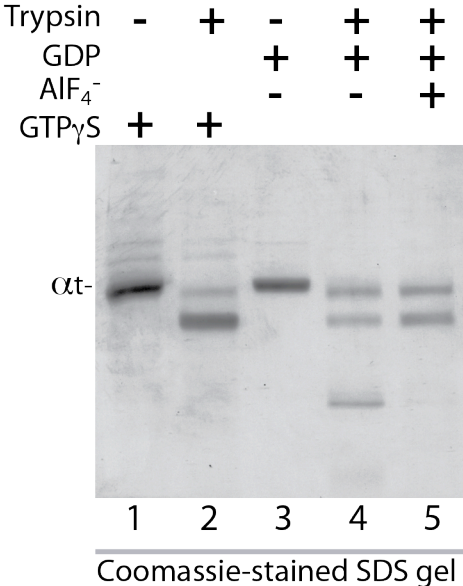

Figure S2

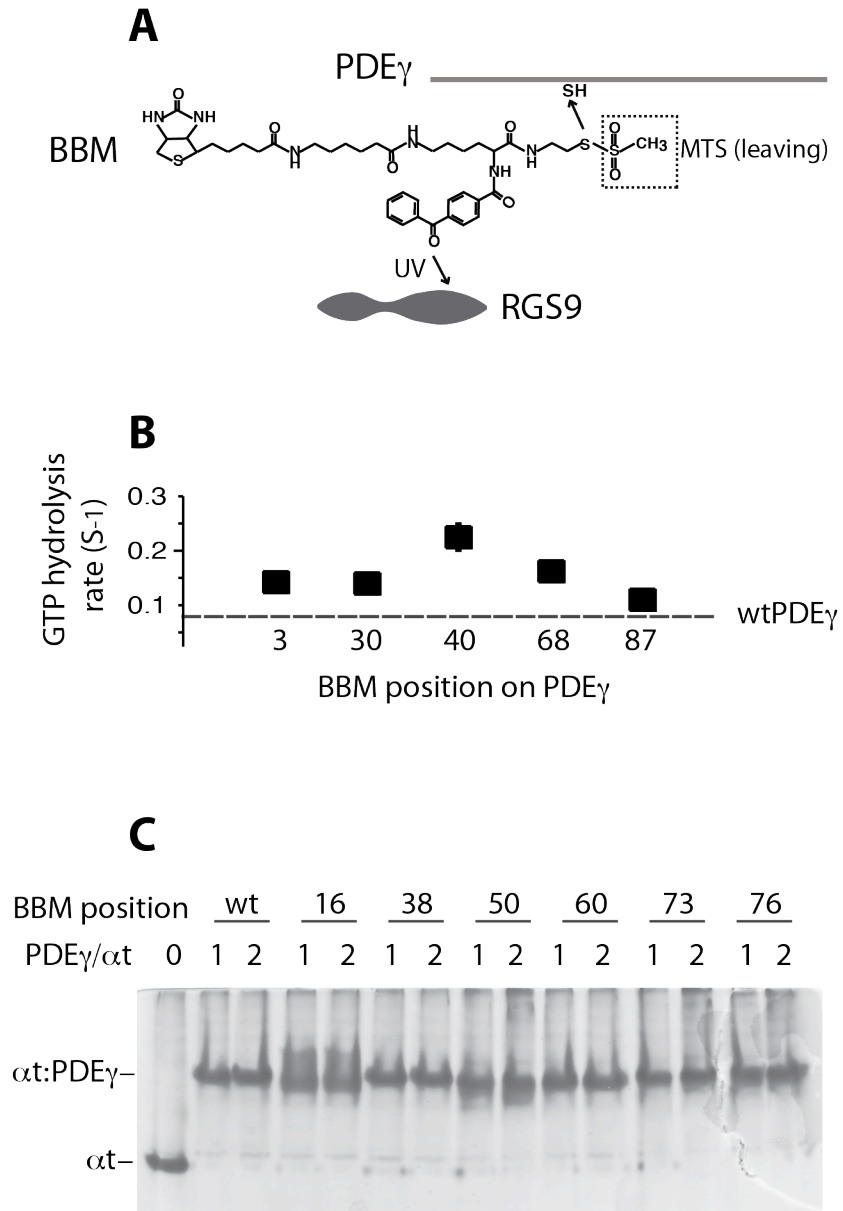

Supplement: supp_M110.210567_jbc.M110.210567-1.pdf [file supp_M110.210567_jbc.M110.210567-1.pdf]
